# Supplementary material for: Topotactic synthesis of layered double hydroxide nanorods
Source: Royal Society of Chemistry journal article supplement (doi:10.1039/c2jm34670b), 2012-01-01
Supplement: c2jm34670b.pdf [file c2jm34670b.pdf]

# Topotactic synthesis of layered double hydroxide nanorods

Chengle J. Wang and Dermot O'Hare\*

Chemistry Research Laboratory, Department of Chemistry, University of Oxford, Mansfield Road,  
Oxford, OX1 3TA.

\* Author for correspondence. Email: [dermot.ohare@chem.ox.ac.uk](mailto:dermot.ohare@chem.ox.ac.uk). Tel: +44 (0) 1865 272686.

**Table S1.** Summary of elemental analysis data for **rod-Gibbsite**, **LiAl-Cl-rod**, **LiAl-Br-rod** and **LiAl-cyclamate**.

| Sample                | Observed ( <i>calc.</i> ) (%) |                |                | Calc. Formula                                                                                |
|-----------------------|-------------------------------|----------------|----------------|----------------------------------------------------------------------------------------------|
|                       | C                             | H              | N              |                                                                                              |
| <b>rod-Gibbsite</b>   | -                             | 3.73<br>(3.85) | -              | Al(OH) <sub>3</sub>                                                                          |
| <b>LiAl-Cl-rod</b>    | -                             | 3.32<br>(3.02) | -              | [LiAl <sub>2</sub> (OH) <sub>6</sub> ]Cl                                                     |
| <b>LiAl-Br-rod</b>    | 0.35<br>(0.25)                | 2.67<br>(2.55) | -              | [LiAl <sub>2</sub> (OH) <sub>6</sub> ](Br) <sub>0.9</sub> (CO <sub>2</sub> ) <sub>0.05</sub> |
| <b>LiAl-cyclamate</b> | 20.07<br>(21.11)              | 5.70<br>(5.28) | 4.57<br>(4.11) | [LiAl <sub>2</sub> (OH) <sub>6</sub> ](C <sub>6</sub> H <sub>12</sub> NSO <sub>3</sub> )     |

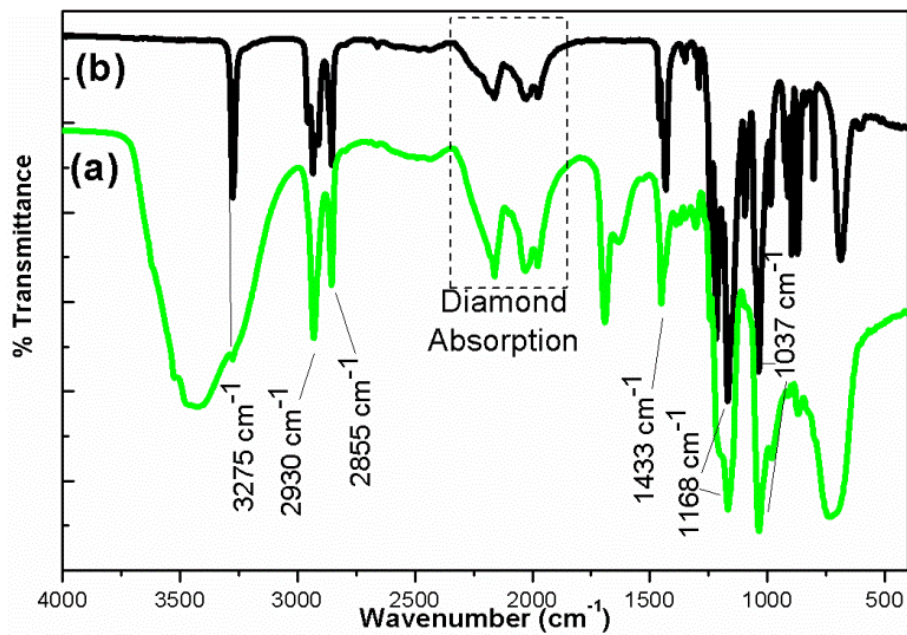

Figure S1. FT-IR spectra of (a) LiAl-cyclamate and (b) pure sodium cyclamate.

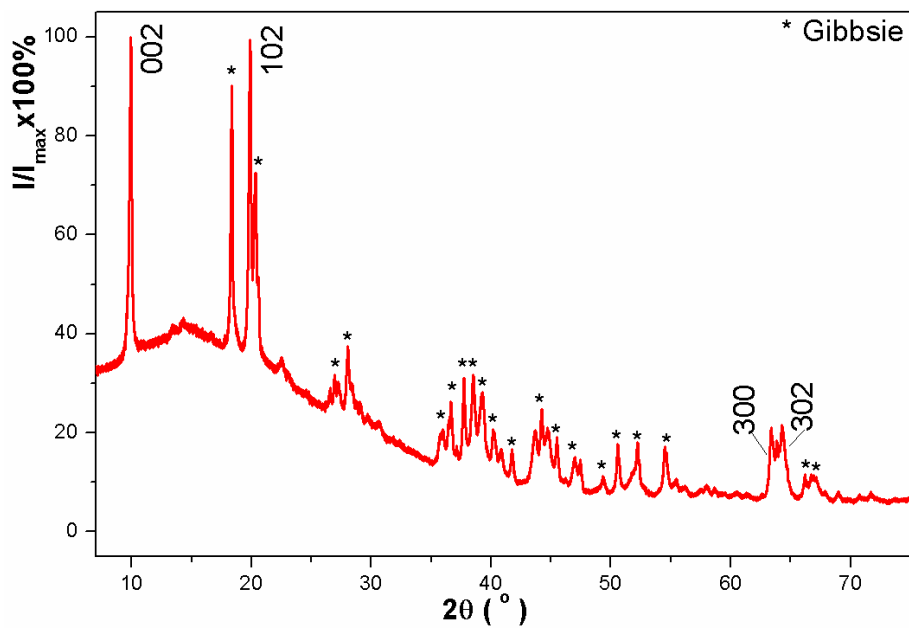

Figure S2. XRD data of LiAl-NO<sub>3</sub>.
